# Supplementary material for: Social exclusion and the perspectives of health care providers on migrants in Gauteng public health facilities, South Africa
Source: PubMed Central journal article supplement (PMC7769451; doi:10.1371/journal.pone.0244080), 2020-12-28
Supplement: pone.0244080.s002.pdf [file pone.0244080.s002.pdf]

# PLOS ONE

## Social exclusion and perceptions of health care providers on migrants in Gauteng public health facilities, South Africa --Manuscript Draft--

|                                                                                                                                                                                                                            |                                                                                                                                                                                                                                                                                                                                                                                                                                                                                                                                                                                                                                                                                                                                                                                                                                                                                                                                                                                                                                                                                                                                                                                                                                                                                                                                                                                                                                                                                                                                                                                                                                                                                                                                                                                                                                                                                                                                                                                                                                                                                                                                                                                                                                                           |
|----------------------------------------------------------------------------------------------------------------------------------------------------------------------------------------------------------------------------|-----------------------------------------------------------------------------------------------------------------------------------------------------------------------------------------------------------------------------------------------------------------------------------------------------------------------------------------------------------------------------------------------------------------------------------------------------------------------------------------------------------------------------------------------------------------------------------------------------------------------------------------------------------------------------------------------------------------------------------------------------------------------------------------------------------------------------------------------------------------------------------------------------------------------------------------------------------------------------------------------------------------------------------------------------------------------------------------------------------------------------------------------------------------------------------------------------------------------------------------------------------------------------------------------------------------------------------------------------------------------------------------------------------------------------------------------------------------------------------------------------------------------------------------------------------------------------------------------------------------------------------------------------------------------------------------------------------------------------------------------------------------------------------------------------------------------------------------------------------------------------------------------------------------------------------------------------------------------------------------------------------------------------------------------------------------------------------------------------------------------------------------------------------------------------------------------------------------------------------------------------------|
| <b>Manuscript Number:</b>                                                                                                                                                                                                  | PONE-D-19-34029                                                                                                                                                                                                                                                                                                                                                                                                                                                                                                                                                                                                                                                                                                                                                                                                                                                                                                                                                                                                                                                                                                                                                                                                                                                                                                                                                                                                                                                                                                                                                                                                                                                                                                                                                                                                                                                                                                                                                                                                                                                                                                                                                                                                                                           |
| <b>Article Type:</b>                                                                                                                                                                                                       | Research Article                                                                                                                                                                                                                                                                                                                                                                                                                                                                                                                                                                                                                                                                                                                                                                                                                                                                                                                                                                                                                                                                                                                                                                                                                                                                                                                                                                                                                                                                                                                                                                                                                                                                                                                                                                                                                                                                                                                                                                                                                                                                                                                                                                                                                                          |
| <b>Full Title:</b>                                                                                                                                                                                                         | Social exclusion and perceptions of health care providers on migrants in Gauteng public health facilities, South Africa                                                                                                                                                                                                                                                                                                                                                                                                                                                                                                                                                                                                                                                                                                                                                                                                                                                                                                                                                                                                                                                                                                                                                                                                                                                                                                                                                                                                                                                                                                                                                                                                                                                                                                                                                                                                                                                                                                                                                                                                                                                                                                                                   |
| <b>Short Title:</b>                                                                                                                                                                                                        | Health care provider perceptions on social exclusion and migrants                                                                                                                                                                                                                                                                                                                                                                                                                                                                                                                                                                                                                                                                                                                                                                                                                                                                                                                                                                                                                                                                                                                                                                                                                                                                                                                                                                                                                                                                                                                                                                                                                                                                                                                                                                                                                                                                                                                                                                                                                                                                                                                                                                                         |
| <b>Corresponding Author:</b>                                                                                                                                                                                               | Janine White, MSocSci<br>University of the Witwatersrand Faculty of Health Sciences<br>Johannesburg, Gauteng SOUTH AFRICA                                                                                                                                                                                                                                                                                                                                                                                                                                                                                                                                                                                                                                                                                                                                                                                                                                                                                                                                                                                                                                                                                                                                                                                                                                                                                                                                                                                                                                                                                                                                                                                                                                                                                                                                                                                                                                                                                                                                                                                                                                                                                                                                 |
| <b>Keywords:</b>                                                                                                                                                                                                           | health care providers; migrants; social exclusion; public health                                                                                                                                                                                                                                                                                                                                                                                                                                                                                                                                                                                                                                                                                                                                                                                                                                                                                                                                                                                                                                                                                                                                                                                                                                                                                                                                                                                                                                                                                                                                                                                                                                                                                                                                                                                                                                                                                                                                                                                                                                                                                                                                                                                          |
| <b>Abstract:</b>                                                                                                                                                                                                           | <p><b>Background :</b> The draft global action plan on migrant health focuses on achieving universal health coverage (UHC) for all people, regardless of citizenship. In South Africa, the proposed National Health Insurance system is the primary UHC reform. Health workers are central to the achievement of UHC, and their attitudes, behaviour or practices could either advance or constrain UHC for migrants. Using a theory of social exclusion, the aim of this study was to examine the perspectives of health care providers on delivering health services to migrants in public health facilities in the Gauteng Province of South Africa.</p> <p><b>Methods :</b> We used stratified, random sampling to select 13 public health care facilities in Gauteng Province. On the randomly selected fieldwork days, all health care providers in ambulatory care were invited to complete a self-administered questionnaire. In addition to socio-demographic information, the questionnaire measured discrimination against migrants and social exclusionary views or practices. Stata® was used to analyse the data, weighted by type of facility and health care provider category.</p> <p><b>Results :</b> We recruited 277 health care providers, with a refusal rate of 10%. The majority of participants were female (77.6%), nurses (51.9%) and had worked for an average of 6.8 years in their facilities. 21.0% of health care providers reported that they had witnessed discrimination against migrants, while 22.6% reported differential treatment of migrant patients. Enrolled nurses and nursing assistants were significantly more likely to agree with social exclusionary views or practices (<math>p &lt; 0.001</math>). The predictors of less exclusionary views were health care providers born outside South Africa (<math>p &lt; 0.05</math>).</p> <p><b>Conclusion :</b> Health care providers are central to UHC, inclusive of migrants. Social exclusionary views or practices must be addressed through a multi-pronged approach, including training in culture-sensitivity, ethics and human rights; and advocacy to ensure that health care providers uphold their professional obligations to all patients.</p> |
| <b>Order of Authors:</b>                                                                                                                                                                                                   | Janine White, MSocSci<br>Duane Blaauw<br>Laetitia Rispel                                                                                                                                                                                                                                                                                                                                                                                                                                                                                                                                                                                                                                                                                                                                                                                                                                                                                                                                                                                                                                                                                                                                                                                                                                                                                                                                                                                                                                                                                                                                                                                                                                                                                                                                                                                                                                                                                                                                                                                                                                                                                                                                                                                                  |
| <b>Additional Information:</b>                                                                                                                                                                                             |                                                                                                                                                                                                                                                                                                                                                                                                                                                                                                                                                                                                                                                                                                                                                                                                                                                                                                                                                                                                                                                                                                                                                                                                                                                                                                                                                                                                                                                                                                                                                                                                                                                                                                                                                                                                                                                                                                                                                                                                                                                                                                                                                                                                                                                           |
| <b>Question</b>                                                                                                                                                                                                            | <b>Response</b>                                                                                                                                                                                                                                                                                                                                                                                                                                                                                                                                                                                                                                                                                                                                                                                                                                                                                                                                                                                                                                                                                                                                                                                                                                                                                                                                                                                                                                                                                                                                                                                                                                                                                                                                                                                                                                                                                                                                                                                                                                                                                                                                                                                                                                           |
| <b>Financial Disclosure</b>                                                                                                                                                                                                | The author(s) received no specific funding for this work.                                                                                                                                                                                                                                                                                                                                                                                                                                                                                                                                                                                                                                                                                                                                                                                                                                                                                                                                                                                                                                                                                                                                                                                                                                                                                                                                                                                                                                                                                                                                                                                                                                                                                                                                                                                                                                                                                                                                                                                                                                                                                                                                                                                                 |
| Enter a financial disclosure statement that describes the sources of funding for the work included in this submission. Review the <a href="#">submission guidelines</a> for detailed requirements. View published research |                                                                                                                                                                                                                                                                                                                                                                                                                                                                                                                                                                                                                                                                                                                                                                                                                                                                                                                                                                                                                                                                                                                                                                                                                                                                                                                                                                                                                                                                                                                                                                                                                                                                                                                                                                                                                                                                                                                                                                                                                                                                                                                                                                                                                                                           |

articles from [PLOS ONE](#) for specific examples.

This statement is required for submission and **will appear in the published article** if the submission is accepted. Please make sure it is accurate.

#### Unfunded studies

Enter: *The author(s) received no specific funding for this work.*

#### Funded studies

Enter a statement with the following details:

- Initials of the authors who received each award
- Grant numbers awarded to each author
- The full name of each funder
- URL of each funder website
- Did the sponsors or funders play any role in the study design, data collection and analysis, decision to publish, or preparation of the manuscript?
- **NO** - Include this sentence at the end of your statement: *The funders had no role in study design, data collection and analysis, decision to publish, or preparation of the manuscript.*
- **YES** - Specify the role(s) played.

\* typeset

#### Competing Interests

Use the instructions below to enter a competing interest statement for this submission. On behalf of all authors, disclose any [competing interests](#) that could be perceived to bias this work—acknowledging all financial support and any other relevant financial or non-financial competing interests.

This statement **will appear in the published article** if the submission is accepted. Please make sure it is accurate. View published research articles from [PLOS ONE](#) for specific examples.

The authors have declared that no competing interests exist.

**NO authors have competing interests**

Enter: *The authors have declared that no competing interests exist.*

**Authors with competing interests**

Enter competing interest details beginning with this statement:

*I have read the journal's policy and the authors of this manuscript have the following competing interests: [insert competing interests here]*

\* typeset

**Ethics Statement**

Enter an ethics statement for this submission. This statement is required if the study involved:

- Human participants
- Human specimens or tissue
- Vertebrate animals or cephalopods
- Vertebrate embryos or tissues
- Field research

Write "N/A" if the submission does not require an ethics statement.

General guidance is provided below. Consult the [submission guidelines](#) for detailed instructions. **Make sure that all information entered here is included in the Methods section of the manuscript.**

This research was approved by the Human Ethics Research Committee (MEDICAL) of the University of the Witwatersrand, ethics number: M170988.

**Format for specific study types**

**Human Subject Research (involving human participants and/or tissue)**

- Give the name of the institutional review board or ethics committee that approved the study
- Include the approval number and/or a statement indicating approval of this research
- Indicate the form of consent obtained (written/oral) or the reason that consent was not obtained (e.g. the data were analyzed anonymously)

**Animal Research (involving vertebrate animals, embryos or tissues)**

- Provide the name of the Institutional Animal Care and Use Committee (IACUC) or other relevant ethics board that reviewed the study protocol, and indicate whether they approved this research or granted a formal waiver of ethical approval
- Include an approval number if one was obtained
- If the study involved *non-human primates*, add *additional details* about animal welfare and steps taken to ameliorate suffering
- If anesthesia, euthanasia, or any kind of animal sacrifice is part of the study, include briefly which substances and/or methods were applied

**Field Research**

Include the following details if this study involves the collection of plant, animal, or other materials from a natural setting:

- Field permit number
- Name of the institution or relevant body that granted permission

**Data Availability**

Authors are required to make all data underlying the findings described fully available, without restriction, and from the time of publication. PLOS allows rare exceptions to address legal and ethical concerns. See the [PLOS Data Policy](#) and [FAQ](#) for detailed information.

No - some restrictions will apply

A Data Availability Statement describing where the data can be found is required at submission. Your answers to this question constitute the Data Availability Statement and **will be published in the article**, if accepted.

**Important:** Stating 'data available on request from the author' is not sufficient. If your data are only available upon request, select 'No' for the first question and explain your exceptional situation in the text box.

Do the authors confirm that all data underlying the findings described in their manuscript are fully available without restriction?

**Describe where the data may be found in full sentences. If you are copying our sample text, replace any instances of XXX with the appropriate details.**

- If the data are **held or will be held in a public repository**, include URLs, accession numbers or DOIs. If this information will only be available after acceptance, indicate this by ticking the box below. For example: *All XXX files are available from the XXX database (accession number(s) XXX, XXX).*
- If the data are all contained **within the manuscript and/or Supporting Information files**, enter the following: *All relevant data are within the manuscript and its Supporting Information files.*
- If neither of these applies but you are able to provide **details of access elsewhere**, with or without limitations, please do so. For example:

*Data cannot be shared publicly because of [XXX]. Data are available from the XXX Institutional Data Access / Ethics Committee (contact via XXX) for researchers who meet the criteria for access to confidential data.*

*The data underlying the results presented in the study are available from (include the name of the third party*

This data is part of a doctoral study, which will be examined in 2020. The ethics number is M170988. The data, codebook, metadata and study documentation is deposited to "Wiredspace" which is an online repository for PHDS and Masters Thesis, data will be published together with the thesis. The permanent link to the repository item will be available end January 2020, contact. [Nina.lewin@wits.ac.za](mailto:Nina.lewin@wits.ac.za) Data Services Library. The data in the submitted research article was collected from health care providers working in public health care facilities in Gauteng Province, South Africa and was captured and is stored in REDCap which runs on the facility of University of Witwatersrand health sciences servers. REDcap contains provisions for complying with HIPPA and offers controlled data access. All health care providers gave their consent for confidential participation before participating in the survey. No personal information was collected. Data access is limited for ethical reasons to controlled access within the Redcap server. The data is available to any Bona fide researchers with appropriate ethics clearance from their institution or on application to the University of Witwatersrand Medical ethics committee. However, all data is available outside of the Redcap server to accredited peer reviewers on a specific peer review access.

|                                                                                                                                                                                                                                         |                                                                                                                                     |
|-----------------------------------------------------------------------------------------------------------------------------------------------------------------------------------------------------------------------------------------|-------------------------------------------------------------------------------------------------------------------------------------|
| <p><i>and contact information or URL).</i></p> <ul style="list-style-type: none"><li>• This text is appropriate if the data are owned by a third party and authors do not have permission to share the data.</li></ul> <p>* typeset</p> |                                                                                                                                     |
| Additional data availability information:                                                                                                                                                                                               | Tick here if your circumstances are not covered by the questions above and you need the journal's help to make your data available. |

1 **Social exclusion and perceptions of health care providers on migrants in**  
2 **Gauteng public health facilities, South Africa**

3 Janine A. White,<sup>1\*</sup> Duane Blaauw,<sup>2</sup> and Laetitia C. Rispel<sup>3</sup>

4 <sup>1</sup> School of Public Health, Faculty of Health Sciences, University of the  
5 Witwatersrand, Johannesburg, South Africa

6 <sup>2</sup> Centre for Health Policy, School of Public Health, Faculty of Health Sciences,  
7 University of the Witwatersrand, Johannesburg, South Africa

8 <sup>3</sup> Centre for Health Policy & Department of Science and Innovation (DSI)/  
9 /National Research Foundation (NRF) Research Chair, School of Public Health,  
10 Faculty of Health Sciences, University of the Witwatersrand, Johannesburg,  
11 South Africa

12 **\*Corresponding author**

13 Janine A. White

14 School of Public Health

15 Faculty of Health Sciences

16 University of the Witwatersrand, Johannesburg

17 27 St Andrew's Road

18 Parktown

19 2193

20 South Africa

21 Telephone: +27 11 717 2193

22 Email: [Janine.white@wits.ac.za](mailto:Janine.white@wits.ac.za)

## 23 **Abstract**

24 **Background:** The draft global action plan on migrant health focuses on achieving  
25 universal health coverage (UHC) for all people, regardless of citizenship. In South  
26 Africa, the proposed National Health Insurance system is the primary UHC reform.  
27 Health workers are central to the achievement of UHC, and their attitudes, behaviour or  
28 practices could either advance or constrain UHC for migrants. Using a theory of social  
29 exclusion, the aim of this study was to examine the perspectives of health care  
30 providers on delivering health services to migrants in public health facilities in the  
31 Gauteng Province of South Africa.

32 **Methods:** We used stratified, random sampling to select 13 public health care facilities  
33 in Gauteng Province. On the randomly selected fieldwork days, all health care providers  
34 in ambulatory care were invited to complete a self-administered questionnaire. In  
35 addition to socio-demographic information, the questionnaire measured discrimination  
36 against migrants and social exclusionary views or practices. Stata® was used to analyse  
37 the data, weighted by type of facility and health care provider category.

38 **Results:** We recruited 277 health care providers, with a refusal rate of 10%. The  
39 majority of participants were female (77.6%), nurses (51.9%) and had worked for an  
40 average of 6.8 years in their facilities. 21.0% of health care providers reported that they  
41 had witnessed discrimination against migrants, while 22.6% reported differential  
42 treatment of migrant patients. Enrolled nurses and nursing assistants were significantly  
43 more likely to agree with social exclusionary views or practices ( $p < 0.001$ ). The  
44 predictors of less exclusionary views were health care providers born outside South  
45 Africa ( $p < 0.05$ ).



46 **Conclusion:** Health care providers are central to UHC, inclusive of migrants. Social  
47 exclusionary views or practices must be addressed through a multi-pronged approach,  
48 including training in culture-sensitivity, ethics and human rights; and advocacy to  
49 ensure that health care providers uphold their professional obligations to all patients.

50

## 51 **Introduction**

52 This millennium has been marked by mass migration [1], with an estimated 70 million  
53 displaced people globally in 2019 [2]. In this paper, migrants refer to people who have  
54 moved across an international border away from their habitual place of residence,  
55 regardless of their legal status, causes of the movement or whether it was voluntary or  
56 involuntary [2]. Worldwide, the unmet health needs of migrants and their lack of access  
57 to essential health services are of concern [3]. Consequently, the 2019-2023 draft  
58 global action plan on the health of migrants focuses on achieving universal health  
59 coverage (UHC) for all people, regardless of citizenship [3]. Some of the key priorities in  
60 the draft action plan are the mainstreaming of migrant health into country-level reform  
61 agendas, the promotion of migrant-sensitive health policies [3], and the development of  
62 health systems that are responsive to their needs [4]. Within the context of UHC,  
63 human resources for health (HRH) are central to its achievement [5]. This is because  
64 health care providers are the personification of any health system and its  
65 responsiveness. Health worker attitudes, behaviour or practices could either advance or  
66 constrain the achievement of UHC for vulnerable individuals, such as migrants [6].

67 In South Africa, there is contestation about the number of migrants, but the **2010**  
**68 census estimated around 2.2 million immigrants [7]**. Legally, there is a constitutional  
69 right to health care for all individuals regardless of nationality, but access to health  
70 services for migrants is complex, especially for those without formal documentation [6].  
71 This is partly due to the significant challenges faced by government in providing high-  
72 quality health care in the public health sector [8]. The proposed National Health  
73 Insurance (NHI) system is the country's primary UHC reform, aimed at addressing the

74 entrenched inequities in its two-tiered health [9]. Although the NHI policy document  
75 lacks clarity on health care for migrants and refugees [9], Chapter 2 of the 2019 NHI  
76 bill makes provision for coverage of permanent residents, refugees, asylum seekers and  
77 conditional cover for “illegal foreigners” [10].

78 In this paper, we draw on the conceptual framework on social exclusion of the Social  
79 Exclusion Knowledge Network (SEKN) to examine the experiences and perspectives of  
80 health care providers on migrants utilising public health services in the Gauteng  
81 Province of South Africa. The SEKN defines social exclusion as the “dynamic,  
82 multidimensional processes driven by unequal power relationships interacting across  
83 four main dimensions-economic, political, social and cultural-and at different levels  
84 including individual, household, group, community, country and global levels”  
85 [11][p36]. In this study, we examined social exclusion at the health system level,  
86 specifically the interactions between migrants (a potentially excluded group), and health  
87 care providers as the personification of the health system.

88 Research on migration has focused on the legal instruments for protecting the human  
89 rights of migrants and refugees [12], health inequities and unmet health needs of  
90 migrants and refugees [13], health policy or system deficiencies [4] and migrant or  
91 refugee experiences and perceptions of health services in the host countries [14]. A  
92 systematic review on health care provider experiences of care provision to migrants and  
93 refugees found major challenges related to diverse cultural beliefs, limited institutional  
94 capacity, and the contradiction between health professional ethics and country-specific  
95 legislation that limit migrants’ right to health care [15]. Another systematic review that  
96 explored challenges and facilitators for health professionals providing primary health

97 care (PHC) for refugees and asylum seekers in high-income countries found that  
98 political decisions affect frontline clinical practice, resourcing priorities, health  
99 professional roles and healthcare access [16]. The health professionals reported that  
100 health care encounters with migrants were influenced by cultural differences, and lack  
101 of knowledge of disease conditions in the host country, exacerbated by health system  
102 challenges such as a lack of training, insufficient time or professional support to  
103 manage complex health problems, referral difficulties, increased costs, and staff  
104 shortages [16]. All of these challenges were experienced within a fluid and changing  
105 policy environment, and widespread hostility of policymakers [16, 17].

106 In Africa, a 2018 WHO report underscored the dearth of empirical information on health  
107 care to migrants and the ethical responsibilities or professional duties of health care  
108 providers [18]. In South Africa, Matlin *et al* [6] have pointed out that despite an  
109 enabling legal framework, health care access for migrants is variable in practice and  
110 influenced by health system factors, health managers' responsiveness and xenophobic  
111 attitudes by health professionals. In a 2011 qualitative study with Zimbabwean migrants  
112 in Cape Town and Johannesburg, Crush and Tawodzera coined the term "medical  
113 xenophobia", defined as the "negative attitudes and practices of health sector  
114 professionals and employees towards migrants and refugees on the job" [19][p.655].  
115 Medical xenophobia included the insistence by managers or health care providers that  
116 patients show identity documentation prior to receiving care [19]. It also includes delay  
117 or denial of treatment on the basis of nationality, refusal to communicate with patients  
118 in a common language (such as English) or to allow the use of translators, and/or  
119 verbal abuse and xenophobic statements and insults [19]. A 2017 qualitative study in

120 Durban, South Africa described the medical xenophobia faced by refugees from the  
121 Democratic Republic of Congo (DRC), such as insistence on documentation, insensitive  
122 comments and other discriminatory practices from providers [20]. Another, small  
123 qualitative study that explored the experiences of eight women refugees and their  
124 attempts at utilising reproductive health care services in Durban's public sector also  
125 reported incidents of medical xenophobia [21].

126 However, all of these South African studies were qualitative in design and none of these  
127 studies explored the views of health care providers. The aim of this study was to  
128 examine the perspectives of health care providers on delivering health services to  
129 migrants in public health facilities in the Gauteng Province of South Africa. The paper  
130 contributes to an **emerging body of literature** that examines quality UHC for migrants  
131 from the perspective of health care providers.

## 132 **Material and Methods**

### 133 **Study design and setting**

134 This is a cross-sectional analytical study conducted in public health care facilities in the  
135 Gauteng Province of South Africa.

136 The study setting was all the public health care facilities in Gauteng Province. The  
137 province is the most densely populated in South Africa, host to **a large number** of  
138 migrants, and has an estimated total population of 14.7 million [22].

139 In Gauteng Province, the public health care system consists of four central hospitals,  
140 that provide highly specialised quaternary and/or tertiary services, serve as referral

141 hospitals for lower level facilities, and are attached to university health science faculties  
142 that train health professionals [23]. There are also two regional tertiary hospitals that  
143 are attached to health science faculties and provide some tertiary and other specialised  
144 services, and nine regional hospitals that provide specialised secondary services in  
145 internal medicine, general surgery, paediatrics, obstetrics and gynaecology and general  
146 surgery. The province has one specialised mother-and child-hospital that functions at  
147 the level of a regional hospital, with some tertiary services. The 11 district hospitals in  
148 the province provide general, inpatient hospital services, and the six specialised  
149 hospitals provide psychiatric services, tuberculosis services, infectious diseases and  
150 rehabilitation services [23]. The primary health care (PHC) system consists of a  
151 network of 30 community health centres (CHCs) and 290 PHC clinics that provide  
152 ambulatory care services. The CHCs tend to have midwife-obstetric units that are open  
153 24 hours per day, seven days per week, while the PHC clinics are day clinics, open from  
154 Monday to Friday.

155 The study population was all health care providers that provide ambulatory care  
156 services. This population included medical doctors (both generalists and specialists),  
157 professional nurses (with four years of training), enrolled nurses (with two years of  
158 training), and nursing auxiliaries or assistants (with one year of training), dentists,  
159 occupational therapists, physiotherapists, pharmacists, who render ambulatory care in  
160 Gauteng public health care facilities [24].

### 161 **Sampling of facilities**

162 We used stratified, random sampling to select the public health care facilities from the  
163 master list of health care facilities in Gauteng Province (obtained from the Gauteng

164 Department of Health), which were categorised as follows: central hospital, regional  
165 tertiary hospital, regional hospital, district hospital, community health centres, PHC  
166 clinics, and a mother and child hospital. We selected two facilities randomly from each  
167 stratum, except in the case of the mother and child hospital, where there is only one.  
168 Hence we sampled 13 public health care facilities in Gauteng.

## 169 **Measures**

170 Following an extensive literature review, we designed a self-administered questionnaire  
171 that obtained information on the socio-demographic profile of health care providers,  
172 and that measured social exclusionary views or practices. We also included an open-  
173 ended question to allow for any additional comments on migrants and their health care  
174 utilisation, but the qualitative information is excluded from this paper.

175 The socio-demographic questions elicited information on age, gender, marital status,  
176 and whether they have children, category of health care provider, and number of years  
177 worked in the health care facility. We measured social exclusionary views or practices  
178 among health care providers in two ways: firstly, health care provider experiences of  
179 discrimination against, or differential treatment of, migrants (two questions measured  
180 by yes or no response); secondly, asking health care providers to rate statements on  
181 social exclusionary views or practices (seven questions). The seven statements that  
182 measured social exclusionary views or practices of health care providers, focused on  
183 examples of medical xenophobia, health professional obligations in relation to migrants,  
184 and whether the NHI system should provide cover to migrants. Two of the questions  
185 were phrased positively and four were phrased negatively. These were measured using  
186 a seven-point Likert scale from strongly disagree (1) to strongly agree (7).

187 We piloted the questionnaire with five health care providers of different categories at a  
188 hospital, clinic and community health centre that were not part of the selected facilities  
189 to determine clarity of questions and the time taken to complete the questionnaire.  
190 Based on the feedback we received, no changes to the provider SAQ were required.

## 191 **Data collection**

192 We conducted the study between April and December 2018. At each of the 13 selected  
193 public health care facilities, we contacted the health facility manager to plan data  
194 collection. For primary health care clinics, we selected three days randomly between  
195 Monday and Friday. In the case of community health centres and hospitals, we selected  
196 two days randomly between Monday and Friday, and one day randomly on the  
197 weekend.

198 The principal researcher (JW) assisted by another trained fieldworker, recruited eligible  
199 health care providers on the randomly selected fieldwork days at each of the selected  
200 facilities. The eligibility criteria for participation in the study included a health care  
201 provider working in ambulatory care in the hospital outpatient or emergency medical  
202 department or in the community health centre and PHC clinics; and the provision of  
203 voluntary, informed, written consent.

204 The research team approached all eligible health care providers on duty on the  
205 randomly selected fieldwork days in the health care facilities. We informed potential  
206 participants that study participation was voluntary, and that they could withdraw from  
207 taking part at any point, without prejudice or negative consequences. Following  
208 informed consent, the health care provider completed the self-administered



209 questionnaire (SAQ) using a tablet, with direct data entry into Research Electronic Data  
210 Capture (REDCap), a secure web-based programme hosted at the University of  
211 Witwatersrand [25]. The refusal rate was less than 10%.

## 212 **Statistical analysis**

213 We used STATA® 15 to analyse the data. Frequency tabulations were done to describe  
214 the socio-demographic and employment characteristics of the study participants.

215 The analysis took account of the complex sampling design. All analyses were weighted  
216 to reflect the distribution of health care providers, by type of health facility and health  
217 worker category, at the provincial level. In the case of the type of facility, we  
218 combined: central hospitals, regional tertiary hospitals and specialised mother and child  
219 facility into one category, called "tertiary hospitals"; and clinics and community health  
220 centres into "primary health care (PHC) facilities". In the case of health care provider,  
221 we combined all the enrolled nurses and nursing assistants into one category, called  
222 enrolled nurses and nursing assistants.

223 We used frequency tabulations to show the proportion of health care providers  
224 reporting that they witnessed discrimination against, or differential treatment of,  
225 migrants. We computed the mean and standard deviations for the 7-point Likert scale  
226 items that measured social exclusionary views or practices. Bivariate analysis was done  
227 to investigate the relationship between the socio-demographic and employment  
228 characteristics of health care providers and each of the responses on social exclusionary  
229 views or practices. All the factors found to be statistically significant at a conservative

230 level of 20% level were included in the multiple regression models. All tests were  
231 conducted at 5% significance level.

## 232 **Ethical considerations**

233 We obtained ethical approval from the Human Research Ethics Committee (Medical) of  
234 the University of the Witwatersrand in Johannesburg (Certificate #: M170988). We also  
235 obtained permission from the Gauteng Department of Health, district health  
236 committees, hospital chief executive officers, and managers of community health  
237 centres and PHC clinics. All participants received a detailed study information sheet, and  
238 provided written consent, via REDCap (Research Electronic Data Capture) a secure,  
239 web-based application for research studies [25]. We complied with the Singapore  
240 Declaration of research integrity [26] and adhered to all ethical procedures, including  
241 informed consent, voluntary participation, confidentiality and anonymity.

242 **Results**

243 **Socio-demographic characteristics of health care providers**

244 A total of 277 health care providers participated in the study (Table 1), the vast  
 245 majority were women (77.6%), with a mean age of 36.2 (SD 11.4) and a median age of  
 246 33 years (range 19-68). The mean age of professional nurses was 45.0 years (SD 11.9),  
 247 while allied health professionals had a mean age of 28.8 (SD 6.9). Nurses constituted  
 248 the majority of study participants (51.9%) and the majority were South African  
 249 (94.8%). A quarter of all study participants worked at central hospitals (25.1%). The  
 250 mean years worked at any of the selected facilities was 6.8 years (SD 8.4).

251 **Table 1. Demographic and employment characteristics of survey participants**

| Variable                                                     | n           | %    |
|--------------------------------------------------------------|-------------|------|
| <b>Age median (range)</b>                                    | 33 (19-68)  |      |
| <b>Age by category of health care professional mean (SD)</b> |             |      |
| Professional nurses                                          | 45.0 (11.9) |      |
| Enrolled nurses and nursing assistants                       | 38.3 (9.6)  |      |
| Medical doctors                                              | 30.8 (7.1)  |      |
| Allied health professionals                                  | 28.8 (6.9)  |      |
| All participants                                             | 36.2 (11.4) |      |
| <b>Age (years)</b>                                           |             |      |
| < 25                                                         | 42          | 15.4 |
| 25-34                                                        | 109         | 40.0 |
| 35-44                                                        | 55          | 20.1 |
| 45-54                                                        | 35          | 12.8 |
| 55+                                                          | 32          | 11.7 |
| <b>Gender</b>                                                |             |      |
| Female                                                       | 215         | 77.6 |
| Male                                                         | 62          | 22.4 |
| <b>Place of birth</b>                                        |             |      |

|                                                             |             |      |
|-------------------------------------------------------------|-------------|------|
| South Africa                                                | 254         | 94.8 |
| Outside South Africa                                        | 14          | 5.2  |
| <b>Marital status</b>                                       |             |      |
| Single                                                      | 124         | 44.8 |
| Living together                                             | 25          | 9.0  |
| Married                                                     | 108         | 40.0 |
| Divorced/ Widowed                                           | 20          | 7.2  |
| <b>Category of health care professional</b>                 |             |      |
| Nurses:                                                     |             |      |
| Enrolled nurses                                             | 30          | 10.8 |
| Nursing assistants                                          | 33          | 11.9 |
| Professional nurses                                         | 81          | 29.2 |
| All categories of nurses                                    | 144         | 51.9 |
| Medical doctors                                             | 70          | 25.3 |
| Allied health professionals:                                |             |      |
| Clinical associate                                          | 1           | 0.4  |
| Social workers                                              | 2           | 0.7  |
| Dieticians/ Dietician assistants                            | 9           | 3.2  |
| Pharmacists/ Pharmacist interns/ Pharmacist assistants      | 24          | 8.7  |
| Radiographers                                               | 6           | 2.2  |
| Rehabilitation therapists (audiologists, speech therapists) | 5           | 1.8  |
| <b>Type of health care facility</b>                         |             |      |
| Central hospital                                            | 72          | 25.1 |
| Clinic                                                      | 27          | 5.0  |
| Community health centre                                     | 24          | 8.7  |
| District hospital                                           | 36          | 13.0 |
| Regional hospital                                           | 65          | 23.5 |
| Regional Tertiary hospital                                  | 51          | 18.4 |
| Specialised Mother & Child hospital                         | 15          | 5.4  |
| <b>Median years (range) worked in facility</b>              | 3 (0.08-39) |      |
| <b>Mean years (SD) worked in facility</b>                   | 6.8 (8.4)   |      |

| <b>Number of years worked in facility</b> |    |      |
|-------------------------------------------|----|------|
| < 2 years                                 | 82 | 29.6 |
| 2-4 years                                 | 81 | 29.2 |
| 5-9 years                                 | 57 | 20.6 |
| 10-14 years                               | 20 | 7.2  |
| 15+ years                                 | 37 | 13.4 |

252

## 253 **Health care provider reported discrimination or differential treatment**

254 The majority of health care providers surveyed (79.0%) reported that they did not  
255 witness any discrimination nor differential treatment (77.3%) of migrants in their work  
256 settings (Fig.1). Although more medical doctors reported that they witnessed  
257 discrimination (31.4%) or differential treatment (31.4%) compared to other categories  
258 of health professional (Fig. 1). When compared using a chi-square test, there was no  
259 association between health care providers reporting of witnessed discrimination ( $\chi^2 =$   
260 4.97;  $p = 0.11$ ) and differential treatment ( $\chi^2 = 5.08$ ;  $p = 0.39$ ).

261 INSERT FIG.1 HERE

## 262 **Social exclusionary views or practices**

263 Table 2 shows health care providers' mean scores of social exclusionary views or  
264 practices by total score, socio-demographic and employment characteristics. Items (or  
265 statements) are arranged in the table from positively worded statements on the left to  
266 negatively worded statements on the right. More exclusionary scores are indicated by  
267 disagreement with 3 positive statements (scores 1-3) and agreement with 4 negative  
268 statements (scores 4-7).

### 269 *Positively-worded statements*

270 Providers obtained an overall mean score of 4.4 for the item on being sensitive to the  
271 health care needs of migrants and refugees. Providers reporting more exclusionary  
272 views for this item, included: the age category of 45 – 54 years (M 3.8; SD 1.8);  
273 enrolled nurses and nursing assistants (M 3.7; SD 1.6) and those working in a health  
274 care facility for a period of 5 – 9 years (M 3.8; SD 2.0). Conversely, providers born

275 outside of South Africa (M 6.5; SD 0.8); medical doctors (M 5.5; SD 2.1) and allied  
276 health professionals (M 5.1; SD 3.1) showed less exclusionary views.

277 The highest overall mean score was obtained for the item on providing the same quality  
278 of care to migrants and refugee as to South Africans was 6.1 (SD 1.5). Similar mean  
279 scores were reported from participants in the age categories 35 – 44 years (M 5.8; SD  
280 1.6) and 45 – 54 years (M 5.9; SD 1.5); those who were single (M 5.8; SD 1.9); and  
281 enrolled nurses/ nursing assistants (M 5.8; SD 1.3). Providers working in a health care  
282 facility for periods between 10 and 14 years (M 5.7; SD 1.1) and periods of more than  
283 15 years (M 5.9; SD 1.5) also showed less exclusionary views.

284 Providers obtained an overall mean score of 3.4 (SD 2.0) for the item on NHI coverage  
285 for migrants and refugees, indicating more exclusionary views. Similarly, providers aged  
286 45-54 years (M 2.8; SD 1.7), those who are allied health professionals (M 2.7; SD 2.6),  
287 and those working in the facility for 10-14 years (M 2.8; SD 1.8) also reported more  
288 exclusionary views. The highest mean score – indicating less exclusionary views - was  
289 obtained for providers born outside of South Africa (M 5.2; SD 2.1).

#### 290 *Negatively-worded statements*

291 Overall, providers showed less exclusionary views for the item on discriminating against  
292 migrant and refugee patients with a mean score of 1.7 (SD 1.1) (Table 2). Mean scores  
293 for this item did not vary by much from the overall mean score, with the highest  
294 obtained for providers working in a health care facility between 10-14 years (M 2.3; SD  
295 1.0), still indicative of less exclusionary views.

296 Providers showed less exclusionary scores for the item on delaying health care to  
297 patients because of their migration status, with an overall mean score of 1.7 (SD 1.2)  
298 (Table 2). Similarly, other mean scores for this item also showed less exclusionary  
299 views, with the highest mean score being 2.2 (SD 1.5), obtained from providers in the  
300 age category of 55 years and older.

301 Overall, providers obtained a mean score of 3.4 (SD 2.1) for the item that migrants and  
302 refugees should return to their home country for health care. Slightly lower mean  
303 scores were obtained for: male participants (M 2.6; SD 1.9); those younger than 25  
304 years old (M 2.7; SD 2.5), those born outside of South Africa (M 1.4; SD 1.6); medical  
305 doctors (M 2.7; SD 2.3) and allied health professionals (M 2.5; SD 2.8).

306 Providers obtained an overall mean score of 4.0 (SD 2.2) for the item on migrants and  
307 refugees only coming to South Africa for health care services. Providers born outside  
308 South Africa (M 2.6; SD 2.2); and allied health professional (M 4.2; SD 3.0) reported  
309 less exclusionary views for this item.



310 **Table 2: Table 2: Providers' mean scores (standard deviations) of social exclusionary**  
 311 **views or practices by socio-demographic and employment characteristics**

| Variable                         |                                      | I am sensitive to the health care needs of migrants and refugees | I provide the same quality of care to migrants and refugees as I do to South Africans. | I believe migrants and refugees should be covered under the NHI. | I discriminate against migrant and refugee patients. | I have delayed health care to patients because of their migrant or refugee status. | I believe migrant and refugee patients should go back to their home country for health care. | I believe that migrant and refugee patients only come to South Africa for health care services. |
|----------------------------------|--------------------------------------|------------------------------------------------------------------|----------------------------------------------------------------------------------------|------------------------------------------------------------------|------------------------------------------------------|------------------------------------------------------------------------------------|----------------------------------------------------------------------------------------------|-------------------------------------------------------------------------------------------------|
|                                  |                                      | Mean (SD)                                                        | Mean (SD)                                                                              | Mean (SD)                                                        | Mean (SD)                                            | Mean (SD)                                                                          | Mean (SD)                                                                                    | Mean (SD)                                                                                       |
| <b>Total</b>                     |                                      | 4.4 (2.1)                                                        | 6.1 (1.5)                                                                              | 3.4 (2.0)                                                        | 1.7 (1.1)                                            | 1.7 (1.2)                                                                          | 3.4 (2.1)                                                                                    | 4.0 (2.2)                                                                                       |
| <b>Gender</b>                    | Male                                 | 4.5 (2.1)                                                        | 6.0 (1.8)                                                                              | 4.0 (2.2)                                                        | 1.5 (1.0)                                            | 1.5 (1.2)                                                                          | 2.6 (1.9)                                                                                    | 3.1 (2.2)                                                                                       |
|                                  | Female                               | 4.4 (2.1)                                                        | 6.1 (1.4)                                                                              | 3.3 (2.0)                                                        | 1.7 (1.1)                                            | 1.7 (1.2)                                                                          | 3.6 (2.1)                                                                                    | 4.1 (2.1)                                                                                       |
| <b>Age Group</b>                 | < 25 years                           | 4.9 (2.7)                                                        | 6.7 (0.7)                                                                              | 4.0 (2.7)                                                        | 1.1 (0.4)                                            | 1.3 (1.0)                                                                          | 2.7 (2.5)                                                                                    | 3.7 (2.3)                                                                                       |
|                                  | 25-34 years                          | 4.5 (2.0)                                                        | 6.1 (1.6)                                                                              | 3.7 (2.1)                                                        | 1.7 (1.3)                                            | 1.6 (1.1)                                                                          | 3.3 (2.1)                                                                                    | 3.5 (2.4)                                                                                       |
|                                  | 35-44 years                          | 4.2 (2.1)                                                        | 5.8 (1.6)                                                                              | 3.4 (2.0)                                                        | 1.7 (0.7)                                            | 1.5 (0.6)                                                                          | 3.2 (2.1)                                                                                    | 4.1 (2.0)                                                                                       |
|                                  | 45-54 years                          | 3.8 (1.8)                                                        | 5.9 (1.5)                                                                              | 2.8 (1.7)                                                        | 2.0 (1.0)                                            | 2.0 (1.2)                                                                          | 3.7 (2.0)                                                                                    | 4.5 (1.8)                                                                                       |
|                                  | 55+ years                            | 4.7 (1.8)                                                        | 6.2 (1.1)                                                                              | 3.4 (1.7)                                                        | 1.7 (0.8)                                            | 2.2 (1.5)                                                                          | 4.0 (1.7)                                                                                    | 4.0 (2.0)                                                                                       |
| <b>Origin</b>                    | Born in South Africa                 | 4.3 (2.0)                                                        | 6.1 (1.5)                                                                              | 3.3 (2.0)                                                        | 1.7 (1.1)                                            | 1.7 (1.2)                                                                          | 3.5 (2.1)                                                                                    | 4.0 (2.2)                                                                                       |
|                                  | Born outside South Africa            | 6.5 (0.8)                                                        | 6.0 (2.2)                                                                              | 5.2 (2.1)                                                        | 1.3 (0.5)                                            | 1.2 (0.5)                                                                          | 1.4 (1.6)                                                                                    | 2.6 (2.2)                                                                                       |
| <b>Marital Status</b>            | Single                               | 4.2 (2.2)                                                        | 5.8 (1.9)                                                                              | 3.2 (1.9)                                                        | 1.7 (1.0)                                            | 1.7 (1.3)                                                                          | 3.5 (2.2)                                                                                    | 4.2 (2.3)                                                                                       |
|                                  | Living together                      | 4.5 (1.8)                                                        | 6.5 (0.9)                                                                              | 4.0 (2.3)                                                        | 1.6 (1.1)                                            | 1.5 (0.6)                                                                          | 3.3 (2.0)                                                                                    | 3.3 (1.9)                                                                                       |
|                                  | Married                              | 4.5 (2.2)                                                        | 6.3 (1.2)                                                                              | 3.8 (2.2)                                                        | 1.6 (0.9)                                            | 1.8 (1.3)                                                                          | 3.2 (2.2)                                                                                    | 3.8 (2.2)                                                                                       |
|                                  | Divorced/Widowed                     | 4.2 (1.7)                                                        | 6.0 (1.2)                                                                              | 3.4 (1.7)                                                        | 2.0 (1.0)                                            | 1.8 (1.0)                                                                          | 3.7 (1.8)                                                                                    | 2.6 (1.6)                                                                                       |
| <b>HCP Category</b>              | Professional nurse                   | 4.5 (1.9)                                                        | 6.1 (1.4)                                                                              | 4.3 (2.0)                                                        | 1.6 (0.8)                                            | 1.7 (1.1)                                                                          | 3.8 (2.0)                                                                                    | 3.2 (1.8)                                                                                       |
|                                  | Enrolled nurse/<br>Nursing assistant | 3.7 (1.6)                                                        | 5.8 (1.3)                                                                              | 4.0 (1.7)                                                        | 2.0 (1.0)                                            | 2.0 (1.0)                                                                          | 3.4 (1.6)                                                                                    | 3.4 (1.6)                                                                                       |
|                                  | Medical doctor                       | 5.5 (2.1)                                                        | 6.4 (1.5)                                                                              | 3.4 (2.4)                                                        | 1.3 (0.9)                                            | 1.3 (0.9)                                                                          | 2.7 (2.3)                                                                                    | 3.8 (2.6)                                                                                       |
|                                  | Allied health professional           | 5.1 (3.1)                                                        | 6.6 (1.4)                                                                              | 2.7 (2.6)                                                        | 1.3 (1.0)                                            | 1.3 (1.2)                                                                          | 2.5 (2.8)                                                                                    | 4.2 (3.0)                                                                                       |
| <b>Type of facility</b>          | Tertiary hospital                    | 4.2 (2.1)                                                        | 6.0 (1.6)                                                                              | 4.1 (2.3)                                                        | 1.8 (1.1)                                            | 2.0 (1.5)                                                                          | 3.6 (2.2)                                                                                    | 3.2 (2.1)                                                                                       |
|                                  | Regional hospital                    | 4.5 (2.2)                                                        | 6.0 (1.3)                                                                              | 3.8 (2.1)                                                        | 1.8 (1.2)                                            | 1.6 (0.8)                                                                          | 3.0 (2.0)                                                                                    | 3.5 (2.0)                                                                                       |
|                                  | District hospital                    | 4.2 (1.8)                                                        | 6.4 (0.5)                                                                              | 3.4 (2.0)                                                        | 1.4 (0.6)                                            | 1.5 (0.9)                                                                          | 3.2 (1.9)                                                                                    | 3.9 (2.1)                                                                                       |
|                                  | PHC facilities                       | 5.0 (2.1)                                                        | 6.0 (2.0)                                                                              | 3.8 (2.1)                                                        | 1.3 (0.6)                                            | 1.4 (1.0)                                                                          | 3.6 (2.2)                                                                                    | 3.8 (1.8)                                                                                       |
| <b>Years working at facility</b> | < 2 years                            | 5.1 (2.3)                                                        | 6.0 (2.3)                                                                              | 3.8 (2.6)                                                        | 1.4 (1.2)                                            | 1.4 (1.1)                                                                          | 3.1 (2.7)                                                                                    | 3.5 (2.5)                                                                                       |
|                                  | 2-4 years                            | 4.6 (2.0)                                                        | 6.3 (1.1)                                                                              | 3.5 (2.0)                                                        | 1.6 (1.2)                                            | 1.5 (1.0)                                                                          | 3.0 (2.0)                                                                                    | 3.5 (2.2)                                                                                       |
|                                  | 5-9 years                            | 3.8 (2.0)                                                        | 6.1 (1.3)                                                                              | 3.7 (2.0)                                                        | 1.7 (0.8)                                            | 1.8 (1.1)                                                                          | 3.4 (1.9)                                                                                    | 4.4 (2.0)                                                                                       |
|                                  | 10-14 years                          | 4.4 (1.6)                                                        | 5.7 (1.1)                                                                              | 2.8 (1.8)                                                        | 2.3 (1.0)                                            | 2.0 (1.0)                                                                          | 4.6 (1.9)                                                                                    | 4.5 (1.9)                                                                                       |
|                                  | 15+ years                            | 4.4 (1.6)                                                        | 5.9 (1.5)                                                                              | 3.0 (1.5)                                                        | 1.7 (0.9)                                            | 2.0 (1.3)                                                                          | 3.7 (1.8)                                                                                    | 4.0 (1.8)                                                                                       |

## 313 **Predictors of social exclusionary views or practices among health care** 314 **providers**

315 Table 4 shows the results of the multiple regression analyses on the predictors of social  
316 exclusionary views or practices among health care providers. A negative co-efficient on  
317 the positively worded statements (first three in table) and a positive co-efficient on the  
318 negatively worded statements (last four in table) indicates more exclusionary views  
319 (Table 4).

320 Participants born outside of South Africa had a significantly higher score ( $p < 0.05$ ) than  
321 those born in South Africa on being sensitive to the health care needs of migrant and  
322 refugee patients, indicative of less exclusionary views. Enrolled nurses and nursing  
323 assistants had a significantly lower score ( $p < 0.001$ ) on being sensitive to the health  
324 care needs of migrant and refugee patients, indicating more exclusionary views.

325 Participants aged 35-44 years and enrolled nurses and nursing assistants held more  
326 exclusionary views on providing the same quality of care to migrant and refugee  
327 patients ( $p < 0.05$ ). With regard to the inclusion of migrants under the NHI, single  
328 participants had significantly lower mean scores ( $p < 0.05$ ), suggesting relatively more  
329 exclusionary views with regard to NHI coverage. Gender, age, category of health care  
330 professional, and years worked in health care facility were no longer significant  
331 contributors in the regression model.

332 Providers aged 25-34 years, 55 years and older, and enrolled nurses and nursing  
333 assistants were significantly more likely to indicate agreement with having discriminated  
334 against migrant patients ( $p < 0.05$ ). In contrast, providers working in district hospitals, in

335 PHC facilities; and providers working in the health care facility for a period of between  
336 10-14 years agreed less with having discriminated against migrant patients ( $p < 0.05$ ).

337 **Category of health care professional and type of health care facility were significant**  
338 **predictors of participants' views on delaying care because of migration status.** In  
339 particular, enrolled nurses and nursing assistants had a significantly higher score  
340 indicating agreement with delaying care because of migration status ( $p < 0.05$ ). On the  
341 other hand, participants who disagreed with this view on delaying care included  
342 providers working in regional hospitals ( $p < 0.001$ ), district hospitals ( $p < 0.05$ ), PHC  
343 facilities ( $p < 0.05$ ).

344 In terms of the view that migrants and refugees should return to their home country for  
345 health services, gender, category of health care professional, and place of birth were  
346 **predictors.** Female participants, professional nurses, enrolled nurses and nursing  
347 assistants had significantly higher scores than any other category of health care  
348 professional ( $p < 0.05$ ). Providers born outside of South Africa had significantly lower  
349 scores than those born in South Africa ( $p < 0.001$ ), indicating less exclusionary views.

350 Female providers had a significantly higher score than male providers on the view that  
351 migrants only come to South Africa for health care services ( $p < 0.05$ ). Similarly, single  
352 participants also held more exclusionary views for this item than others in the marital  
353 status category ( $p < 0.05$ ). Professional nurses, ( $p < 0.001$ ), enrolled nurses and nursing  
354 assistants ( $p < 0.05$ ), and medical doctors ( $p < 0.05$ ) had higher scores, indicating  
355 agreement with this view on migrants only coming to South Africa for health care.

**Table 3: Predictors of social exclusionary views or practices among health care providers**

| Variable                         | I am sensitive to the health care needs of migrants and refugees. |          | I provide the same quality of care to migrants and refugees as I do to South Africans. |         | I believe migrants and refugees should be covered under the NHI. |         | I discriminate against migrant and refugee patients. |         | I have delayed health care to patients because of their migrant or refugee status. |         | I believe migrant and refugee patients should go back to their home country for health care. |         | I believe that migrant and refugee patients only come to South Africa for health care or services. |         |
|----------------------------------|-------------------------------------------------------------------|----------|----------------------------------------------------------------------------------------|---------|------------------------------------------------------------------|---------|------------------------------------------------------|---------|------------------------------------------------------------------------------------|---------|----------------------------------------------------------------------------------------------|---------|----------------------------------------------------------------------------------------------------|---------|
|                                  | β                                                                 | p-value  | β                                                                                      | p-value | β                                                                | p-value | β                                                    | p-value | β                                                                                  | p-value | β                                                                                            | p-value | β                                                                                                  | p-value |
| <b>Gender</b>                    | Reference: Male                                                   |          |                                                                                        |         |                                                                  |         |                                                      |         |                                                                                    |         |                                                                                              |         |                                                                                                    |         |
|                                  | Female                                                            |          |                                                                                        |         |                                                                  |         |                                                      |         |                                                                                    |         |                                                                                              |         |                                                                                                    |         |
|                                  | -                                                                 | -        | -                                                                                      | -       | -0.65                                                            | 0.18    | 0.15                                                 | 0.37    | 0.09                                                                               | 0.73    | 0.95                                                                                         | 0.005*  | 0.87                                                                                               | 0.033*  |
| <b>Age Group</b>                 | Reference: < 25 years                                             |          |                                                                                        |         |                                                                  |         |                                                      |         |                                                                                    |         |                                                                                              |         |                                                                                                    |         |
|                                  | 25-34 years                                                       |          |                                                                                        |         |                                                                  |         |                                                      |         |                                                                                    |         |                                                                                              |         |                                                                                                    |         |
|                                  | 0.27                                                              | 0.49     | -0.50                                                                                  | 0.08    | -0.32                                                            | 0.28    | 0.46                                                 | 0.016*  | 0.04                                                                               | 0.83    | 0.40                                                                                         | 0.36    | -0.46                                                                                              | 0.36    |
|                                  | 35-44 years                                                       |          |                                                                                        |         |                                                                  |         |                                                      |         |                                                                                    |         |                                                                                              |         |                                                                                                    |         |
|                                  | 0.04                                                              | 0.94     | -0.77                                                                                  | 0.040*  | -0.71                                                            | 0.12    | 0.18                                                 | 0.34    | -0.10                                                                              | 0.75    | -0.02                                                                                        | 0.96    | -0.03                                                                                              | 0.97    |
|                                  | 45-54 years                                                       |          |                                                                                        |         |                                                                  |         |                                                      |         |                                                                                    |         |                                                                                              |         |                                                                                                    |         |
|                                  | 0.23                                                              | 0.69     | -0.70                                                                                  | 0.16    | -1.19                                                            | 0.07    | 0.48                                                 | 0.05    | 0.29                                                                               | 0.50    | 0.10                                                                                         | 0.86    | 0.40                                                                                               | 0.51    |
|                                  | 55+ years                                                         |          |                                                                                        |         |                                                                  |         |                                                      |         |                                                                                    |         |                                                                                              |         |                                                                                                    |         |
|                                  | 1.36                                                              | 0.16     | -0.35                                                                                  | 0.38    | -0.45                                                            | 0.51    | 0.59                                                 | 0.004*  | 0.78                                                                               | 0.11    | 0.55                                                                                         | 0.50    | 0.02                                                                                               | 0.98    |
| <b>Marital Status</b>            | Reference: Married                                                |          |                                                                                        |         |                                                                  |         |                                                      |         |                                                                                    |         |                                                                                              |         |                                                                                                    |         |
|                                  | Single                                                            |          |                                                                                        |         |                                                                  |         |                                                      |         |                                                                                    |         |                                                                                              |         |                                                                                                    |         |
|                                  | -                                                                 | -        | 0.22                                                                                   | 0.56    | -0.82                                                            | 0.010*  | -                                                    | -       | 0.00                                                                               | 0.98    | -                                                                                            | -       | 0.69                                                                                               | 0.045*  |
|                                  | Living together                                                   |          |                                                                                        |         |                                                                  |         |                                                      |         |                                                                                    |         |                                                                                              |         |                                                                                                    |         |
|                                  | -                                                                 | -        | -0.60                                                                                  | 0.17    | 0.01                                                             | 0.98    | -                                                    | -       | -0.13                                                                              | 0.65    | -                                                                                            | -       | -0.32                                                                                              | 0.45    |
|                                  | Divorced/Widowed                                                  |          |                                                                                        |         |                                                                  |         |                                                      |         |                                                                                    |         |                                                                                              |         |                                                                                                    |         |
|                                  | -                                                                 | -        | -0.33                                                                                  | 0.46    | -0.74                                                            | 0.23    | -                                                    | -       | -0.25                                                                              | 0.57    | -                                                                                            | -       | -0.78                                                                                              | 0.30    |
| <b>Born in/ out South Africa</b> | Reference: Born in SA                                             |          |                                                                                        |         |                                                                  |         |                                                      |         |                                                                                    |         |                                                                                              |         |                                                                                                    |         |
|                                  | Born outside SA                                                   |          |                                                                                        |         |                                                                  |         |                                                      |         |                                                                                    |         |                                                                                              |         |                                                                                                    |         |
|                                  | 1.58                                                              | 0.001*   | -                                                                                      | -       | -                                                                | -       | 0.01                                                 | 0.97    | -0.02                                                                              | 0.92    | -1.36                                                                                        | p<0.001 | -1.17                                                                                              | 0.026*  |
| <b>HCP Category</b>              | Reference: Allied health professional                             |          |                                                                                        |         |                                                                  |         |                                                      |         |                                                                                    |         |                                                                                              |         |                                                                                                    |         |
|                                  | Professional nurse                                                |          |                                                                                        |         |                                                                  |         |                                                      |         |                                                                                    |         |                                                                                              |         |                                                                                                    |         |
|                                  | -0.64                                                             | 0.13     | -0.48                                                                                  | 0.08    | -0.77                                                            | 0.15    | 0.00                                                 | 0.98    | 0.21                                                                               | 0.32    | 1.23                                                                                         | 0.029*  | 1.91                                                                                               | 0.001*  |
|                                  | Enrolled nurses & nursing assistants                              |          |                                                                                        |         |                                                                  |         |                                                      |         |                                                                                    |         |                                                                                              |         |                                                                                                    |         |
|                                  | -1.32                                                             | p< 0.001 | -0.73                                                                                  | 0.010*  | -0.64                                                            | 0.18    | 0.54                                                 | 0.012*  | 0.49                                                                               | 0.030*  | 1.13                                                                                         | 0.009*  | 1.42                                                                                               | 0.033*  |
|                                  | Medical doctor                                                    |          |                                                                                        |         |                                                                  |         |                                                      |         |                                                                                    |         |                                                                                              |         |                                                                                                    |         |
|                                  | -0.13                                                             | 0.67     | -0.19                                                                                  | 0.44    | -0.56                                                            | 0.23    | -0.08                                                | 0.71    | 0.06                                                                               | 0.78    | 0.69                                                                                         | 0.22    | 1.65                                                                                               | p<0.001 |
| <b>Type of facility</b>          | Reference: Tertiary hospital                                      |          |                                                                                        |         |                                                                  |         |                                                      |         |                                                                                    |         |                                                                                              |         |                                                                                                    |         |
|                                  | Regional hospital                                                 |          |                                                                                        |         |                                                                  |         |                                                      |         |                                                                                    |         |                                                                                              |         |                                                                                                    |         |
|                                  | -                                                                 | -        | 0.10                                                                                   | 0.72    | -                                                                | -       | 0.01                                                 | 0.98    | -0.40                                                                              | p<0.001 | -                                                                                            | -       | -                                                                                                  | -       |
|                                  | District hospital                                                 |          |                                                                                        |         |                                                                  |         |                                                      |         |                                                                                    |         |                                                                                              |         |                                                                                                    |         |
|                                  | -                                                                 | -        | 0.45                                                                                   | 0.06    | -                                                                | -       | -0.46                                                | 0.015*  | -0.37                                                                              | 0.010*  | -                                                                                            | -       | -                                                                                                  | -       |
|                                  | PHC facility                                                      |          |                                                                                        |         |                                                                  |         |                                                      |         |                                                                                    |         |                                                                                              |         |                                                                                                    |         |
|                                  | -                                                                 | -        | -0.00                                                                                  | 0.99    | -                                                                | -       | -0.37                                                | 0.042*  | -0.52                                                                              | 0.001*  | -                                                                                            | -       | -                                                                                                  | -       |
| <b>Years working at facility</b> | Reference: < 2 years                                              |          |                                                                                        |         |                                                                  |         |                                                      |         |                                                                                    |         |                                                                                              |         |                                                                                                    |         |
|                                  | 2-4 years                                                         |          |                                                                                        |         |                                                                  |         |                                                      |         |                                                                                    |         |                                                                                              |         |                                                                                                    |         |
|                                  | -0.06                                                             | 0.81     | -                                                                                      | -       | -0.21                                                            | 0.61    | -0.08                                                | 0.66    | -0.07                                                                              | 0.73    | -0.55                                                                                        | 0.25    | 0.01                                                                                               | 0.98    |
|                                  | 5-9 years                                                         |          |                                                                                        |         |                                                                  |         |                                                      |         |                                                                                    |         |                                                                                              |         |                                                                                                    |         |
|                                  | -0.46                                                             | 0.27     | -                                                                                      | -       | 0.41                                                             | 0.48    | -0.10                                                | 0.58    | 0.13                                                                               | 0.74    | -0.26                                                                                        | 0.65    | 0.63                                                                                               | 0.27    |
|                                  | 10-14 years                                                       |          |                                                                                        |         |                                                                  |         |                                                      |         |                                                                                    |         |                                                                                              |         |                                                                                                    |         |
|                                  | -0.01                                                             | 0.98     | -                                                                                      | -       | -0.31                                                            | 0.64    | 0.58                                                 | 0.027*  | 0.31                                                                               | 0.40    | 0.72                                                                                         | 0.20    | 0.45                                                                                               | 0.52    |
|                                  | 15 or more years                                                  |          |                                                                                        |         |                                                                  |         |                                                      |         |                                                                                    |         |                                                                                              |         |                                                                                                    |         |
|                                  | -1.16                                                             | 0.21     | -                                                                                      | -       | 0.01                                                             | 0.98    | -0.23                                                | 0.59    | -0.18                                                                              | 0.74    | -0.41                                                                                        | 0.34    | -0.26                                                                                              | 0.38    |
| <b>Constant</b>                  | 5.13                                                              | p<0.001  | 7.26                                                                                   | 0.000** | 5.55                                                             | p<0.001 | 3.73                                                 | 0.001   | 1.43                                                                               | 0.018   | 1.73                                                                                         | 0.001   | 1.54                                                                                               | 0.022   |

Only predictor variables statistically significant at 20% in the bivariate analysis were included in the multiple regression models. \*p<0.05

## 358 Discussion

359 This is one of the first surveys in South Africa, and indeed in Africa, that examined the  
360 perspectives of health care providers on public health care services to migrants. Most of  
361 the study participants were female (77.6%) and nurses (51.9%). This is not surprising  
362 as the majority of health care providers in South Africa are nurses, and women [27].  
363 Our study showed that predictors of providers' more exclusionary or less exclusionary  
364 views included female gender, single status, 25 years and older, category of health care  
365 provider, type of facility and years worked in a health care facility.

366 In our study, providers obtained a score of 3.4 for the item on sensitivity to the health  
367 needs of migrants; and a score of 6.1 for providing the same quality of care. As with a  
368 previous study, we showed that providers born outside South Africa reported greater  
369 sensitivity to the needs of migrants [28]. This finding makes sense because these  
370 providers are themselves migrants. The Canadian study showed that those providers  
371 born outside Canada expressed greater cultural sensitivity and were more comfortable  
372 with immigrant patients compared to their counterparts from Canada [28]. In contrast,  
373 enrolled nurses and nursing assistants in our study had lower scores for sensitivity to  
374 the needs of migrants, suggesting more exclusionary views. Possible explanations for  
375 these exclusionary views could be related to insufficient or lack of training on culturally-  
376 responsive health care, as enrolled nurses undergo two years of training and nursing  
377 assistants undergo only one year of training. Other studies in Canada and Australia,  
378 albeit with physicians, found that cultural barriers mitigated against the provision of  
379 migrant-sensitive health care services [29-31]. Several studies in Canada and Australia  
380 demonstrated the benefits to migrant patient outcomes when health care providers

381 received culture-sensitivity training [32], as the training enhanced their expressed  
382 sensitivity [33, 34], empathy [35] and cultural humility [36]. Although the context of  
383 these studies cited are different from that of South Africa, there would be value in  
384 ethics and culture-sensitivity training for health care providers in the South African  
385 public service, focusing on enrolled nurses and nursing assistants.

386 The overall mean score for the item on discrimination against migrants was 1.7. This  
387 means that health care providers in our study indicated disagreement with this  
388 statement. Similarly, the mean score for delayed care to migrants - a form of  
389 discrimination - was 1.7. These responses are encouraging. In the regression analysis,  
390 providers aged 25-34, older than 55, enrolled nurses and nursing assistants, and  
391 working in a health care facility for between 10 and 14 years reported greater  
392 agreement with this discriminatory statement, and thus more exclusionary views.  
393 Interestingly, working in a district hospital and PHC facility was a predictor of less  
394 exclusionary views. Of additional concern is that one in five health care providers  
395 (21.0%) reported that they had witnessed discrimination, and 22.6% reported that they  
396 had witnessed differential treatment of migrants in their work settings. These reported  
397 discrimination and differential treatment are an example of the attitudes and behaviours  
398 associated with medical xenophobia in the South African public health system [37]. A  
399 South African study among medical students found that 10% reported that they had  
400 witnessed discriminatory behaviour of providers against patients on the basis of race,  
401 ethnicity or age [38]. Studies in Europe [39, 40] that examined health care providers'  
402 experiences of discrimination found both a reluctance to talk about discrimination, and  
403 evidence of discriminatory attitudes towards migrant patients. However, another study

404 in Greece found a mixed picture of the interaction between providers and migrants,  
405 with some providers prioritizing the health care of citizens over migrants, while others  
406 provided unrestricted health care access to undocumented migrants despite restrictive  
407 laws [41].

408 South Africa's Constitution outlaws discrimination [42] because of the country's  
409 apartheid history, where there were gross violations of the rights of black people [43].  
410 Health care providers are required to uphold professional and ethical standards of care  
411 [44, 45]. The various health professional Oaths emphasis service to humanity,  
412 practising with conscience and with dignity, pursuing justice and advocating on behalf  
413 of vulnerable and disadvantaged patients [46, 47]. Although the majority of health care  
414 providers in our study appear to meet their professional obligations, it is unacceptable  
415 that a minority of providers expressed social exclusionary views. A combination of  
416 strategies is needed to ensure that migrant-sensitive health services are provided, and  
417 that all patients in the Gauteng public health service are treated with respect and  
418 dignity, regardless of nationality. These strategies include advocacy training and  
419 campaigns that emphasise the rights and responsibilities of providers, engagement of  
420 civil society organisations, and clear communication about the complaints mechanisms,  
421 including the toll-free number of the Health Ombud [48]. There should also be adverse  
422 consequences for those health care providers that continue discrimination against  
423 migrants, and they should be reported to the relevant health professions council for  
424 possible disciplinary action.

425 The mean score for the item that migrants should return to their home country for  
426 health care was 3.4, and that migrants only come to South Africa for health care was

427 4.0. Female providers, professional nurses and enrolled nurses and nursing assistants  
428 had significantly higher agreement than the other categories, suggesting more social  
429 exclusionary views. These views could explain the mean score of 3.4 for NHI coverage  
430 for migrants, suggesting that participants did not agree with the inclusion of migrants  
431 and refugees in the proposed NHI. In the regression, single status was the only  
432 predictor of a more exclusionary view. **It is unclear why** single participants had these  
433 views and highlight this finding as an unusual finding in our study. Despite this  
434 anomaly, it is still of concern that more health care providers hold this view, given that  
435 they have a critical role to play in the achievement of UHC [49]. Scholars have  
436 suggested that health care providers work in constrained conditions, exacerbated by  
437 migrant-unfriendly regulatory frameworks, policies and political rhetoric [50]. This  
438 context might explain the social exclusionary views of some of these health workers  
439 surveyed views. Moreover, the understanding that migrants only come to South Africa  
440 for health care may not necessarily be indicative of exclusionary views. In other words,  
441 it may reflect the reality of migrants who because of virtual collapse of health care in  
442 home countries, such as the case in Zimbabwe, will make decisions about survival and  
443 that is to seek health care in South Africa.

444 The study is limited by its cross-sectional nature, and the self-reported information  
445 obtained from health care providers. However, the self-administered questionnaire  
446 using tablets, allowed providers to express their views in a confidential manner. The  
447 study was only conducted in Gauteng Province, and the findings might not apply to  
448 other provinces. However, there are numerous study strengths. This is one of the first  
449 surveys that examined the views of health care providers on migrants utilising public



450 health facilities, rather than the systemic barriers or challenges in the interactions  
451 between migrants and providers [15, 16, 51]. The random sampling of facilities and  
452 fieldwork days gives robustness to our findings. The questionnaire could be adapted by  
453 other researchers in similar settings, and complemented with qualitative research to  
454 add depth to the quantitative findings. Future research could include a larger sample of  
455 public health facilities in Gauteng, as well as comparisons with other provinces.

456 As South Africa moves towards the implementation of the NHI, discrimination and other  
457 social exclusionary views or practices of health care providers will undermine progress.  
458 The United Nations has called on Member States to put an end to discrimination of  
459 migrants in health care settings, through a joint statement outlining three key priority  
460 areas of action: supporting the rights of both patients and providers; tackling  
461 discrimination through an evidence base and appropriate legal frameworks that ensure  
462 accountability; and lastly, collaboration between governments, civil society and  
463 communities to address the determinants of discrimination [52]. Health care providers  
464 are the foundation of quality UHC. Our study findings suggest the complexity of the  
465 interaction between providers and migrant patients in Gauteng rather than a  
466 straightforward or "single" narrative. Given its economic importance, Gauteng should  
467 take the lead in implementing the UN recommendations, and to develop more inclusive  
468 health policies to the benefit of all patients, in support of the achievement of UHC.

## 469 **Conclusion**

470 Health care providers, specifically medical doctors and nurses, are at the front-line of  
471 health care delivery and are thus integral to the provision of migrant-sensitive health  
472 care. Given this criticality, providers' perspectives on social exclusionary views or

473 practices are important in shaping inclusive health policies. Using a lens of social  
474 exclusion, we have generated new knowledge on health care provider-migrant  
475 interactions in Gauteng Province. This study has shown that health care providers, in  
476 most instances enrolled nurses and nursing assistants, have significantly more  
477 exclusionary views of migrants within the context of health care services. Social  
478 exclusionary views or practices must be addressed at all levels through a multi-pronged  
479 approach, that includes training in culture-sensitivity, ethics and human rights;  
480 promoting health care providers as advocates for migrant patients and their rights; and  
481 recognising the importance of an enabling health system.

482

483 **Acknowledgements**

484 We acknowledge Dr Bridget Ikalafeng for facilitating permission at Provincial level to  
485 conduct the study. We also thank the CEOs and facility managers for permission to  
486 conduct the study at facilities and the ease of access their support provided. Professor  
487 Jonathan Levin and Dr Innocent Maposa are acknowledged for their statistical inputs.  
488 We acknowledge the 5 fieldworkers who assisted with data collection. A special  
489 acknowledgement is given to the providers who participated in the study.

490 **Author Contributions**

491 Author Contributions Conceptualization: Janine Anthea White, Laetitia Charmaine Rispel.

492 Data curation: Janine Anthea White.

493 Formal analysis: Janine Anthea White, Duane Blaauw, Laetitia Charmaine Rispel.

494 Funding acquisition: Janine Anthea White.

495 Investigation: Janine Anthea White.

496 Methodology: Janine Anthea White, Laetitia Charmaine Rispel.

497 Project administration: Janine Anthea White.

498 Supervision: Laetitia Charmaine Rispel.

499 Validation: Janine Anthea White.

500 Visualization: Janine Anthea White.

501 Writing – original draft: Janine Anthea White.

502 Writing – review & editing: Janine Anthea White, Duane Blaauw, Laetitia Charmaine  
503 Rispel.

504

505

## 506 References

- 507 1. Internal Displacement Monitoring Centre. IDMC Grid 2016 – Global Report on  
508 Internal Displacement: IDMC; 2016 [22 May 2019]. Available from:  
509 <http://www.internal-displacement.org/globalreport2016/>.
- 510 2. United Nations High Commissioner for Refugees. Global Appeal 2018/2019.  
511 Geneva: 2019.
- 512 3. World Health Organization. Promoting the health of refugees and migrants: Draft  
513 global action plan, 2019–2023. Report by the Director-General. Seventy-second World  
514 Health Assembly, A72/25, Provisional agenda item 12.4, 25 April 2019. Geneva: World  
515 Health Organization, 2019.
- 516 4. World Health Organization. Beyond the barriers Framing evidence on health  
517 system strengthening to improve the health of migrants experiencing poverty and social  
518 exclusion. Geneva: 2017 9789241513364.
- 519 5. World Health Organization. Global strategy on human resources for health:  
520 Workforce 2030. Geneva: World Health Organization, 2016.
- 521 6. Matlin SA, Depoux A, Schütte S, Flahault A, Saso L. Migrants' and refugees'  
522 health: towards an agenda of solutions. Public Health Reviews.  
523 2018;39:27:<https://doi.org/10.1186/s40985-018-0104-9>.
- 524 7. Statistics South Africa. Census 2011. Statistical release (Revised). Pretoria: 2011.
- 525 8. South African Lancet National Commission. Confronting the right to ethical and  
526 accountable quality health care in South Africa: A Consensus Report. Pretoria National  
527 Department of Health 2019.
- 528 9. NDoH. National Health Insurance Policy: Towards universal health coverage.  
529 Pretoria, Republic of South Africa: National Department of Health (NDoH), 2017.
- 530 10. Republic of South Africa. National Health Insurance Bill, (2019).
- 531 11. Popay J, Escorel S, Hernandez M, Johnston H, Mathieson J, Rispel L, on behalf of  
532 the WHO Social Exclusion Knowledge Network. Understanding and Tackling Social  
533 Exclusion: Final Report of the Social Exclusion Knowledge Network of the Commission  
534 on Social Determinants of Health. Geneva: World Health Organization, 2008.
- 535 12. Lori JR, Boyle JS. Forced migration: Health and human rights issues among  
536 refugee populations. Nursing Outlook. 2015;63(1):68-76. doi:  
537 10.1016/J.OUTLOOK.2014.10.008.
- 538 13. World Health Organization. How health systems can address health inequities  
539 linked to migration and ethnicity. Copenhagen: 2010.
- 540 14. Human Rights Watch. No Healing Here: Violence, Discrimination and Barriers to  
541 Health for Migrants in South Africa [Internet]. New York: Human Rights Watch, 2009.
- 542 15. Suphanchaimat R, Kantamaturapoj K, Putthasri W, Prakongsai P. Challenges in  
543 the provision of healthcare services for migrants: A systematic review through  
544 providers' lens. BMC Health Services Research. 2015;15:1-14. doi: 10.1186/s12913-  
545 015-1065-z.
- 546 16. Robertshaw L, Dhesi S, Jones LL. Challenges and facilitators for health  
547 professionals providing primary healthcare for refugees and asylum seekers in high-  
548 income countries: a systematic review and thematic synthesis of qualitative research.  
549 BMJ Open. 2017;7(8):e015981. doi: 10.1136/bmjopen-2017-015981.

- 550 17. Smith AC, LeVoy M. Cities of rights: Ensuring health care for undocumented  
551 residents. Brussels: The Platform for International Cooperation on Undocumented  
552 Migrants (PICUM), 2017.
- 553 18. WHO AFRO. Health of refugees and migrants: Practices in addressing the health  
554 needs of refugees and migrants. Brazzaville: World Health Organization Regional Office  
555 for Africa; 2018.
- 556 19. Crush J, Tawodzera G. Medical Xenophobia: Zimbabwean access to health  
557 services in South Africa. Cape Town: Southern African Migration Programme (SAMP) &  
558 Open Society Initiative for Southern Africa (OSISA), 2011.
- 559 20. Zihindula G, Meyer-Weitz A, Akintola O. Lived experiences of Democratic  
560 Republic of Congo refugees facing medical xenophobia in Durban, South Africa. *Journal*  
561 *of Asian and African Studies*. 2017;52(4):458-70.
- 562 21. Munyaneza Y, Mhlongo EM. Medical Xenophobia: The Voices of Women Refugees  
563 in Durban, Kwazulu-Natal, South Africa. *BioRxiv*. 2019:603753.
- 564 22. Statistics South Africa. Mid-year population estimates 2018. Pretoria: Statistics  
565 South Africa, 2018.
- 566 23. Republic of South Africa. National Health Act, Stat. 35101 (2003).
- 567 24. Hassim A, Heywood M, Berger J. Health & democracy: a guide to human rights,  
568 health law and policy in post-apartheid South Africa. Johannesburg: SiberInk; 2007. 520  
569 p.
- 570 25. Harris PA, Taylor R, Thielke R, Payne P, Gonzalez N, Conde JG. Research  
571 electronic data capture (REDCap) - A metadata-driven methodology and workflow  
572 process for providing translational research informatics support *J Biomed Inform*.  
573 2009;42(2):377-81.
- 574 26. Singapore statement on research integrity. World Conference on Research  
575 Integrity; 2010; Singapore.
- 576 27. Department of Health. Strategic Plan for Nursing Education, Training and  
577 Practice 2012/13–2016/17. Pretoria: Department of Health (DOH), 2013.
- 578 28. Papic O, Malak Z, Rosenberg E. Survey of family physicians' perspectives on  
579 management of immigrant patients: Attitudes, barriers, strategies, and training needs.  
580 *Patient Education and Counseling*. 2012;86(2):205-9. doi: 10.1016/j.pec.2011.05.015.
- 581 29. Scheppers E, Van Dongen E, Dekker J, Geertzen J, Dekker J. Potential barriers to  
582 the use of health services among ethnic minorities: a review. *Family practice*.  
583 2006;23(3):325-48.
- 584 30. Uiters E, Devillé W, Foets M, Spreuwenberg P, Groenewegen PP. Differences  
585 between immigrant and non-immigrant groups in the use of primary medical care; a  
586 systematic review. *BMC health services research*. 2009;9(1):76.
- 587 31. Farley R, Askew D, Kay M. Caring for refugees in general practice: perspectives  
588 from the coalface. *Australian Journal of Primary Health*. 2014;20(1):85-91.
- 589 32. Majumdar B, Browne G, Roberts J, Carpio B. Effects of Cultural Sensitivity  
590 Training on Health Care Provider Attitudes and Patient Outcomes. *Journal of Nursing*  
591 *Scholarship*. 2004;36(2):161-6. doi: 10.1111/j.1547-5069.2004.04029.x.
- 592 33. Lawrence J, Kearns R. Exploring the 'fit' between people and providers: refugee  
593 health needs and health care services in Mt Roskill, Auckland, New Zealand. *Health &*  
594 *social care in the community*. 2005;13(5):451-61.

- 595 34. Suurmond J, Seeleman C, Rupp I, Goosen S, Stronks K. Cultural competence  
596 among nurse practitioners working with asylum seekers. *Nurse education today*.  
597 2010;30(8):821-6.
- 598 35. Burchill J, Pevalin DJ. Demonstrating cultural competence within health-visiting  
599 practice: working with refugee and asylum-seeking families. *Diversity and Equality in*  
600 *Health and Care*. 2014;11(2):151-9.
- 601 36. Tobin CL, Murphy-Lawless J. Irish midwives' experiences of providing maternity  
602 care to non-Irish women seeking asylum. *International journal of women's health*.  
603 2014;6:159.
- 604 37. Crush J, Tawodzera G. Medical Xenophobia and Zimbabwean Migrant Access to  
605 Public Health Services in South Africa. *Journal of Ethnic and Migration Studies*.  
606 2014;40(4):655-70. doi: 10.1080/1369183X.2013.830504.
- 607 38. Vivian LMH, Naidu CS, Keikelame MJ, Irlam J. Medical students' experiences of  
608 professional lapses and patient rights abuses in a South African health sciences faculty.  
609 *Academic Medicine*. 2011;86(10):1282-7. doi: 10.1097/ACM.0b013e31822be4b8.
- 610 39. European Union Agency for Fundamental Rights. Inequalities and multiple  
611 discrimination in access to and quality of healthcare Luxembourg: 2013.
- 612 40. Papadakaki M, Lionis C, Saridaki A, Dowrick C, de Brún T, O'Reilly-de Brún M, et  
613 al. Exploring barriers to primary care for migrants in Greece in times of austerity:  
614 Perspectives of service providers. *European Journal of General Practice*.  
615 2017;23(1):129-35. doi: 10.1080/13814788.2017.1307336.
- 616 41. Teunissen E, Tsaparas A, Saridaki A, Trigoni M, van Weel-Baumgarten E, Van  
617 Weel C, et al. Reporting mental health problems of undocumented migrants in Greece:  
618 A qualitative exploration. *European Journal of General Practice*. 2016;22(2):119-25.
- 619 42. Republic of South Africa. Constitution of the Republic of South Africa 1996, Act  
620 108 of 1996. URL: <http://www.info.gov.za>: 1996.
- 621 43. Coovadia H, Jewkes R, Barron P, Sanders D, McIntyre D. The health and health  
622 system of South Africa: historical roots of current public health challenges. *Lancet*.  
623 2009;374:817-34. doi: <http://thelancet.com>.
- 624 44. Dhai A. The Life Esidimeni tragedy: Moral pathology and an ethical crisis. *South*  
625 *African Medical Journal*. 2018;108(5):382-5.
- 626 45. Lown BA. Compassion Is a Necessity and an Individual and Collective  
627 Responsibility. Comment on "Why and How Is Compassion Necessary to Provide Good  
628 Quality Healthcare?". *International Journal of Health Policy and Management*.  
629 2015;4(9):613-4. doi: 10.15171/ijhpm.2015.110. PubMed PMID: 26340491.
- 630 46. World Medical Association. Declaration of Geneva May 2006 [cited 2019 25  
631 November]. Available from: [https://www.wma.net/policies-post/wma-declaration-of-](https://www.wma.net/policies-post/wma-declaration-of-geneva/)  
632 [geneva/](https://www.wma.net/policies-post/wma-declaration-of-geneva/).
- 633 47. SANC. Nurses' Pledge n.d. [cited 2019 25 November]. Available from:  
634 <https://www.sanc.co.za/aboutpledge.htm>.
- 635 48. Office of the Health Ombud. Official website of the Office of the Health Ombud  
636 [cited 2019 25 November]. Available from: <http://healthombud.org.za/>.
- 637 49. World Health Organization. Draft thirteenth general programme of work, 2019–  
638 2023. Report by the Director-General. World Health Assembly Seventy-first World  
639 Health Assembly, 71/4, Provisional agenda item 11.1. Geneva: World Health  
640 Organization, 2018.

- 641 50. Vearey J, Modisenyane M, Hunter-Adams J. Towards a migration-aware health  
642 system in South Africa: a strategic opportunity to address health inequity. In: Padarath  
643 A, Barron P, editors. South African Health Review 2017. Durban: Health Systems Trust;  
644 2017.
- 645 51. Ahmed S, Shommu NS, Rumana N, Barron GRS, Wicklum S, Turin TC. Barriers to  
646 Access of Primary Healthcare by Immigrant Populations in Canada: A Literature Review.  
647 Journal of Immigrant and Minority Health. 2016;18(6):1522-40. doi: 10.1007/s10903-  
648 015-0276-z.
- 649 52. United Nations. Joint United Nations statement on ending discrimination in health  
650 care settings. 2017.

651

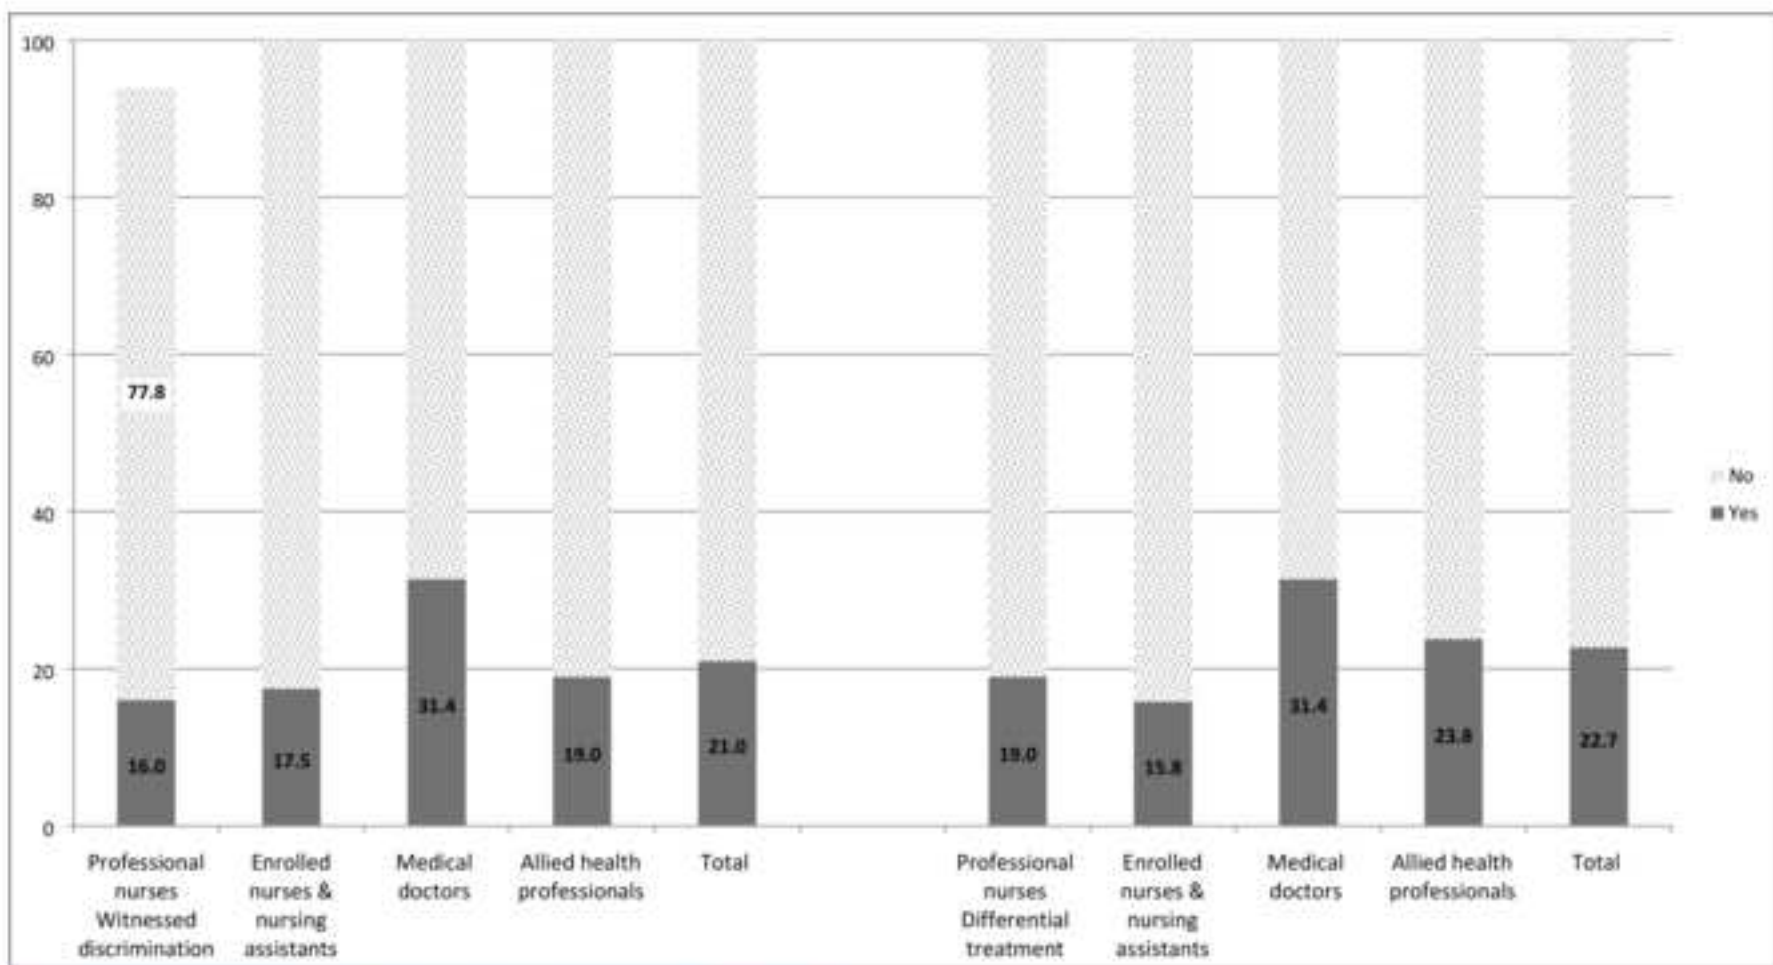

Figure 1: Reported discrimination or differential treatment witnessed by health care providers
